# Supplementary material for: Evaluation of Biomarkers of Severity in Patients with COVID-19 Infection
Source: MDPI journal article supplement (doi:10.3390/jcm10173775), 2021-08-24
Supplement: s1 [file s1]

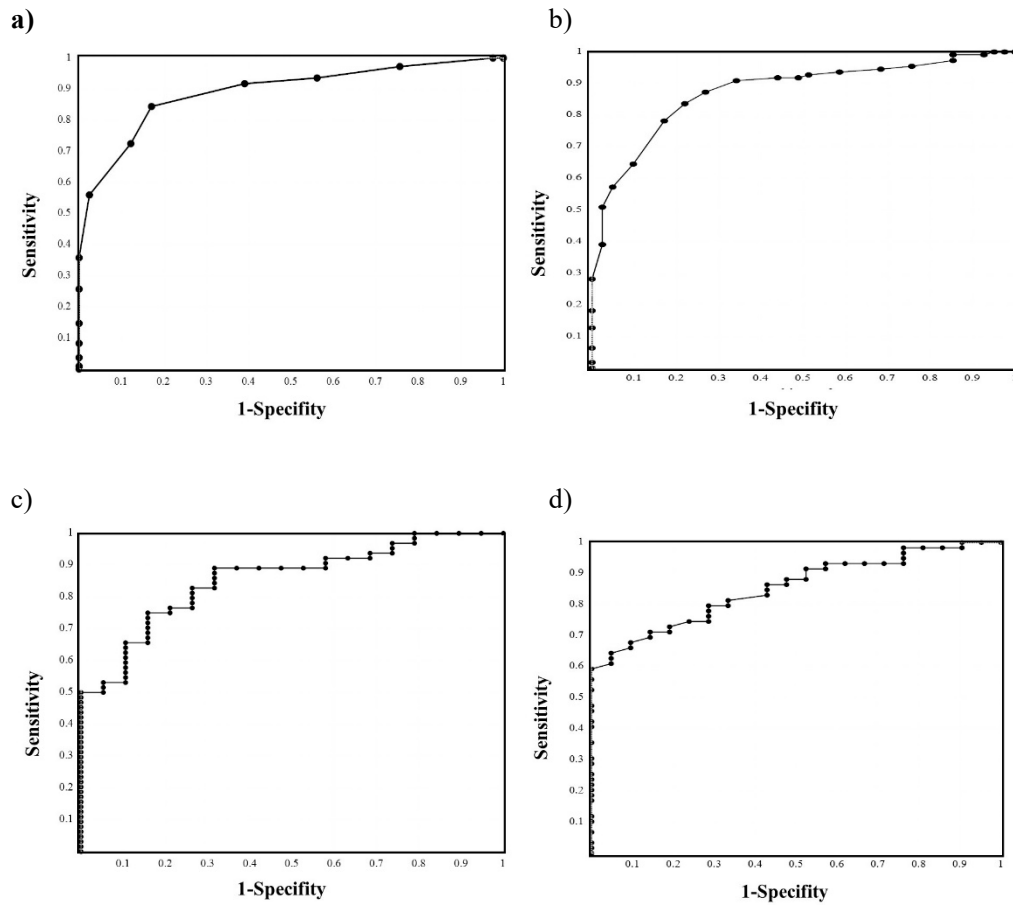

**Supplementary Figure S1 (Figure S1)** An ROC analysis to determine the cutoff values of the A/G ratio (a), albumin (b), ferritin (c) and procalcitonin (d) (mild to moderate I vs.  $\geq$ moderate II to severe)
